# Supplementary material
Source: PubMed Central journal article supplement (PMC9929096)
Supplement: 41467_2023_36561_MOESM1_ESM.pdf [file 41467_2023_36561_MOESM1_ESM.pdf]

## IGROV-1 cells

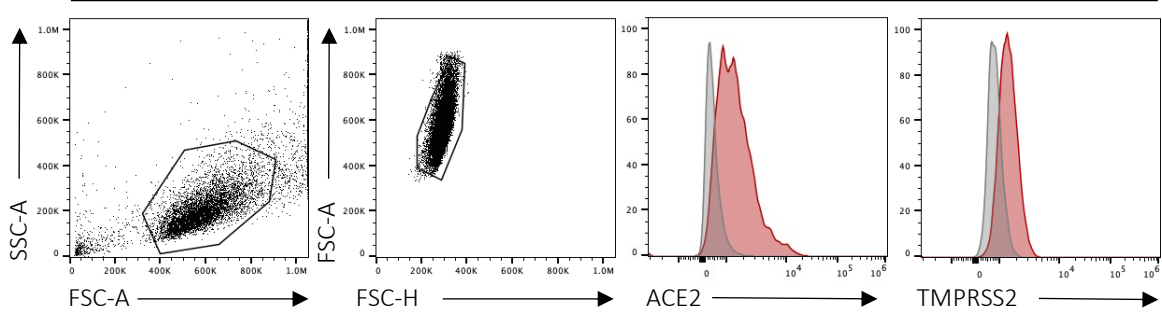

**Extended data Figure 1.** Phenotyping of IGROV-1 cells by flow cytometry. IGROV-1 cells were stained with anti-ACE2 and anti-TMPRSS2 antibodies and analyzed by flow cytometry. Representative examples of the gating strategy (left) and of the signals obtained are shown (right).

Delta+ nasopharyngeal swab

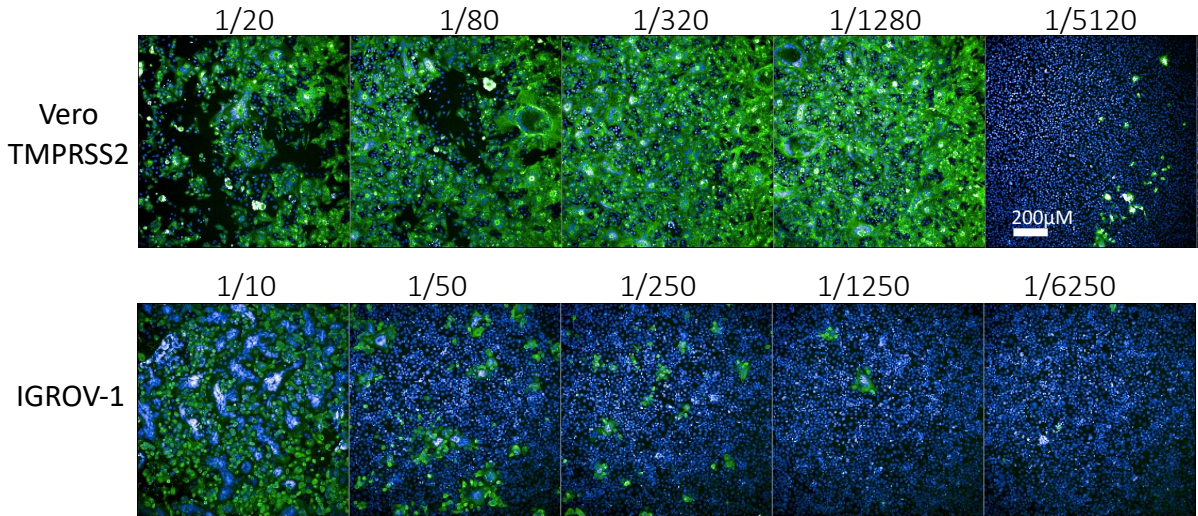

BA.1+ nasopharyngeal swab

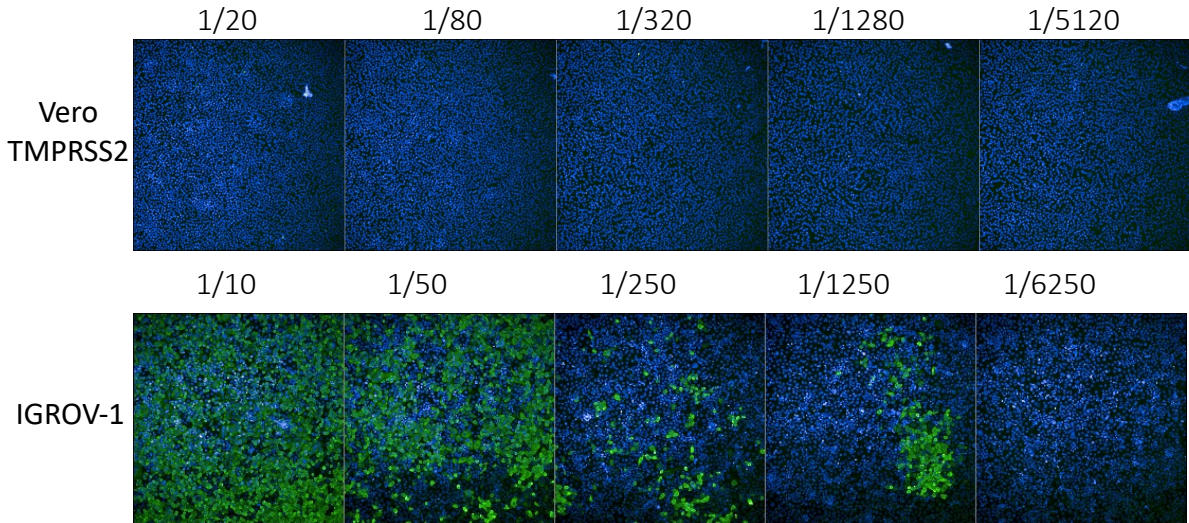

**Extended data Figure 2. Infectivity of Delta- and Omicron-positive nasopharyngeal swabs on Vero-TMPRSS2 and IGROV-1 cells.** Nasopharyngeal swabs from either Delta or Omicron-infected individuals were cultivated on Vero-TMPRSS2 and IGROV-1 cells. For each of the 135 nasal swabs, 10 serial dilutions were performed to calculate viral infectivity titers. The 5 first dilutions are shown. The dilution factor is indicated on the top of each image. Each sample was tested once. After 48h of culture, cells were stained using a pan-coronavirus anti-N antibody to visualize infection (AlexaFluor488 in green) and Hoechst to visualize nuclei (in blue). Both swabs have a RT-qPCR Cycle threshold (CT) of 16.4. Two representative individuals are displayed. Scale bar, 200 μm.

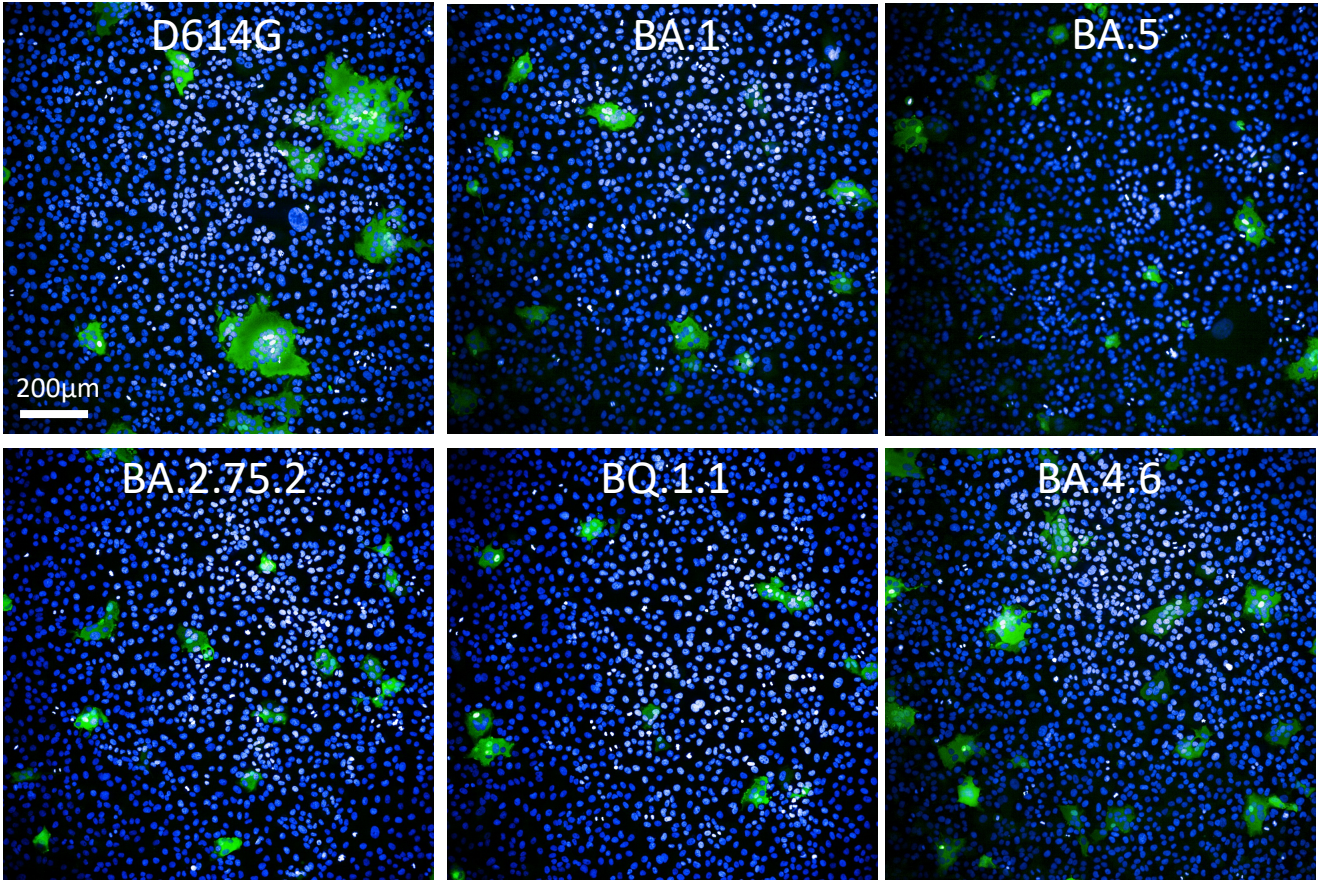

**Extended data Figure 3. SARS-CoV-2 variants Delta, BA.1, BA.5, BA.2.75.2, BQ.1.1 and BA.4.6 induce syncytia in S-Fuse cells.** S-Fuse cells that become GFP + upon cell-cell fusion were exposed to the indicated SARS-CoV-2 strains. After 20 h, cells were stained with Hoechst to visualize nuclei. Syncytia (green) and nuclei (blue) are shown. Representative images from three independent experiments are shown. Scale bar, 200  $\mu\text{m}$ .

## Characteristics of the individuals with RT-PCR+ nasopharyngeal swabs

| Delta positive nasopharyngeal swabs        |              |            |
|--------------------------------------------|--------------|------------|
| Sex                                        | Female       | 25         |
|                                            | Male         | 28         |
| Age (Median; range)                        |              | 61 (24;98) |
| Immunodeficiency                           |              | 6          |
| Vaccination statut (Number of patients)    |              |            |
|                                            | Unvaccinated | 33         |
|                                            | 1st dose     | 2          |
|                                            | 2nd dose     | 10         |
|                                            | 3rd dose     | 7          |
|                                            | 4th dose     | 0          |
| Sampling days post-symptom (median; range) |              | 7 (0;30)   |

| BA.1 positive nasopharyngeal swabs         |              |            |
|--------------------------------------------|--------------|------------|
| Sex                                        | Female       | 49         |
|                                            | Male         | 32         |
| Age (Median; range)                        |              | 41 (19;98) |
| Immunodeficiency                           |              | 7          |
| Vaccination statut (Number of patients)    |              |            |
|                                            | Unvaccinated | 12         |
|                                            | 1st dose     | 6          |
|                                            | 2nd dose     | 41         |
|                                            | 3rd dose     | 13         |
|                                            | 4th dose     | 1          |
| Sampling days post-symptom (median; range) |              | 2 (0;21)   |

## Characteristics of the cohort of vaccinated individuals with or without breakthrough infection

| 1 month post-third dose                        |        |                        |
|------------------------------------------------|--------|------------------------|
| Sex                                            | Female | 8                      |
|                                                | Male   | 10                     |
| Age (Median; range)                            |        | 60 (36;95)             |
| Immunodeficiency                               |        | 0                      |
| Previous COVID-19                              |        | 0                      |
| 1st dose                                       |        | Jan 6 - April 19, 2021 |
| 2nd dose                                       |        | Jan 26 - May 31, 2021  |
| 3rd dose                                       |        | Aug 31 - Dec 10, 2021  |
| Sampling days post-vaccination (median; range) |        | 34 days (24;54)        |

  

| 4 months post-third dose                       |        |                        |
|------------------------------------------------|--------|------------------------|
| Sex                                            | Female | 3                      |
|                                                | Male   | 7                      |
| Age (Median; range)                            |        | 63 (53;94)             |
| Immunodeficiency                               |        | 0                      |
| Previous COVID-19                              |        | 0                      |
| 1st dose                                       |        | Jan 8 - Feb 4, 2021    |
| 2nd dose                                       |        | Jan 29 - March 3, 2021 |
| 3rd dose                                       |        | Sept 6 - Nov 16, 2021  |
| Sampling days post-vaccination (median; range) |        | 132 days (99;232)      |

  

| 3 months post-breakthrough BA.1/2               |        |                             |
|-------------------------------------------------|--------|-----------------------------|
| Sex                                             | Female | 7                           |
|                                                 | Male   | 9                           |
| Age (Median; range)                             |        | 58 (34;72)                  |
| Immunodeficiency                                |        | 0                           |
| Vaccination statut (Number of patients)         |        |                             |
| 3 doses                                         |        | 16                          |
| Breakthrough BA.1                               |        | Dec 26, 2021 - Jun 22, 2022 |
| Sampling days post-breakthrough (median; range) |        | 84 days (44;109)            |

  

| 8 months post-breakthrough BA.1/2               |        |                               |
|-------------------------------------------------|--------|-------------------------------|
| Sex                                             | Female | 5                             |
|                                                 | Male   | 8                             |
| Age (Median; range)                             |        | 59 (36;72)                    |
| Immunodeficiency                                |        | 0                             |
| Vaccination statut (Number of patients)         |        |                               |
| 3 doses                                         |        | 13                            |
| Breakthrough BA.1/BA.2                          |        | Dec 26, 2021 - April 14, 2022 |
| Sampling days post-breakthrough (median; range) |        | 234 days (142;289)            |

  

| 2 months post-breakthrough BA.5                 |        |                       |
|-------------------------------------------------|--------|-----------------------|
| Sex                                             | Female | 10                    |
|                                                 | Male   | 5                     |
| Age (Median; range)                             |        | 62 (22;93)            |
| Immunodeficiency                                |        | 0                     |
| Vaccination statut (Number of patients)         |        |                       |
| 2 doses                                         |        | 1                     |
| 3 doses                                         |        | 10                    |
| 4 doses                                         |        | 4                     |
| Breakthrough BA.5 (days of positive PCR)        |        | July 7 - Oct 10, 2022 |
| Sampling days post-breakthrough (median; range) |        | 50 days (12;127)      |
